# Supplementary material
Source: Research Square preprint supplement (doi:10.21203/rs.3.rs-9091462/v1)
Supplement: Supplementary file 1 [file 0866e99bfb8f7b21da93bc93.docx]

**NIR-Activated NO-Propelled Nanomotors for Deep Tumor Penetration and DNA-Repair Sensitized Photothermal Therapy of Prostate Cancer**

Jie Hea,c,1, Xiaoli Zhanga,1, Qiqi Yang*e*, Ji Sune, Yu Anc,d, Kehua Jiangf, Fa Suna,*, Janguo Zhua,f,*, and Kun Chenb,*

*a Medical College, Guizhou University, Guizhou 550000, P. R. China*

*b Department of Medical Genetics, Guizhou Provincial People’s Hospital, Guizhou 550000, P. R. China*

*c Central Laboratory, Guizhou Provincial People’s Hospital, Guizhou 550000, P. R. China*

*d NHC Key Laboratory of Pulmonary Immune-related Diseases, Guizhou Provincial People’s Hospital, Guizhou 550000, P. R. China*

*eGuizhou Medical University, Guizhou 550000, P. R. China*

*fDepartment of Urology, Guizhou Provincial People’s Hospital, Guizhou 550000, P. R. China*

1 These authors contributed equally to this work.

*Corresponding author. Guizhou Provincial People's Hospital*,* No. 83, Zhongshan East Road, Guiyang, Guizhou, 550002, P.R. China. Phone: 86-0851-85937212

E-mail Address: [44844956@qq.com](mailto:44844956@qq.com) (K. Chen); sfgmc@sina.com (F. Sun); [doctorzhujianguo@163.com](mailto:doctorzhujianguo@163.com) (J. Zhu).


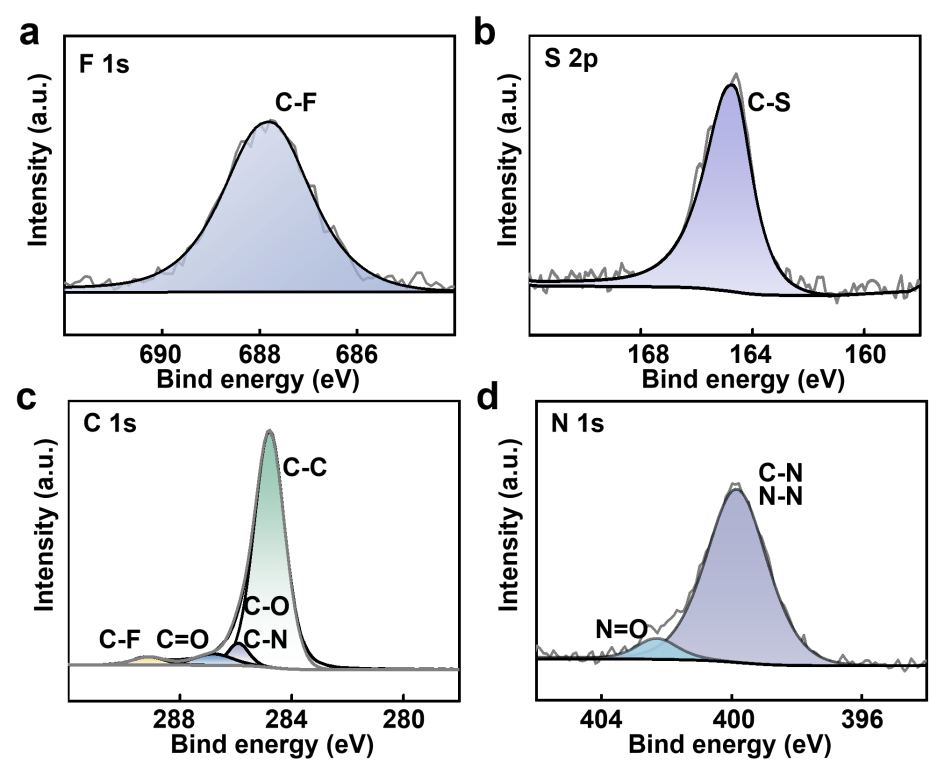


**Fig. S1.** (a) High-resolution XPS spectrum of (a) F1 s, (b)S 2p, (c)C 1s, (d) N 1s peaks of M/B@PDA-VHH NPs.


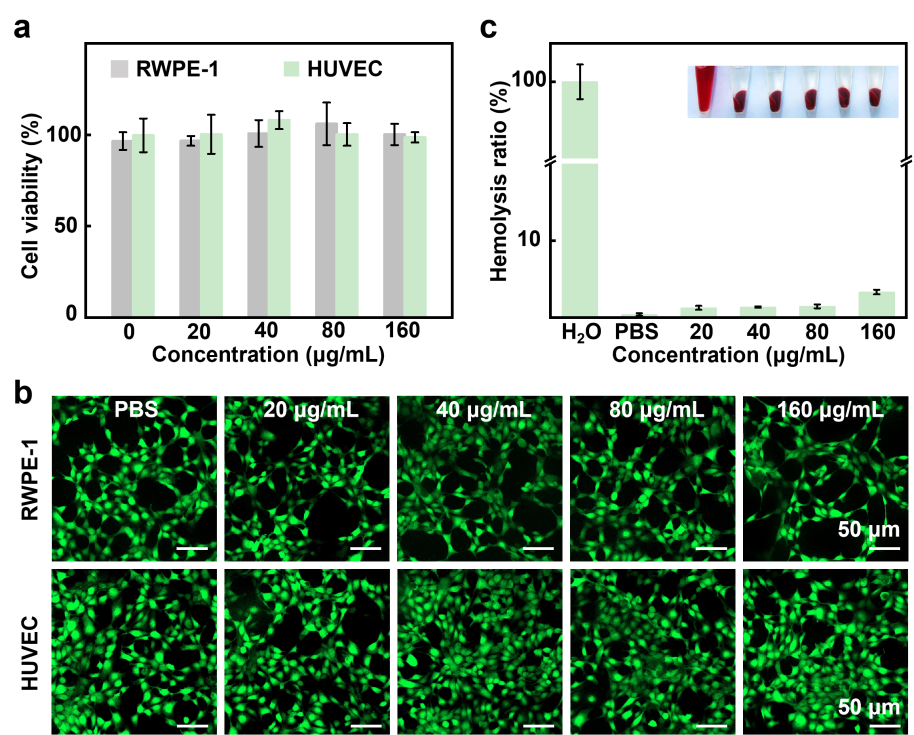


**Fig. S2.** (a) RWPE-1 and HUVEC viability after treatment with different concentrations of M/B@PDA-VHH NPs(n=3). (b) Hemolysis rate of RBC after incubation with M/B@PDA-VHH NPs with different concentrations(n=3).


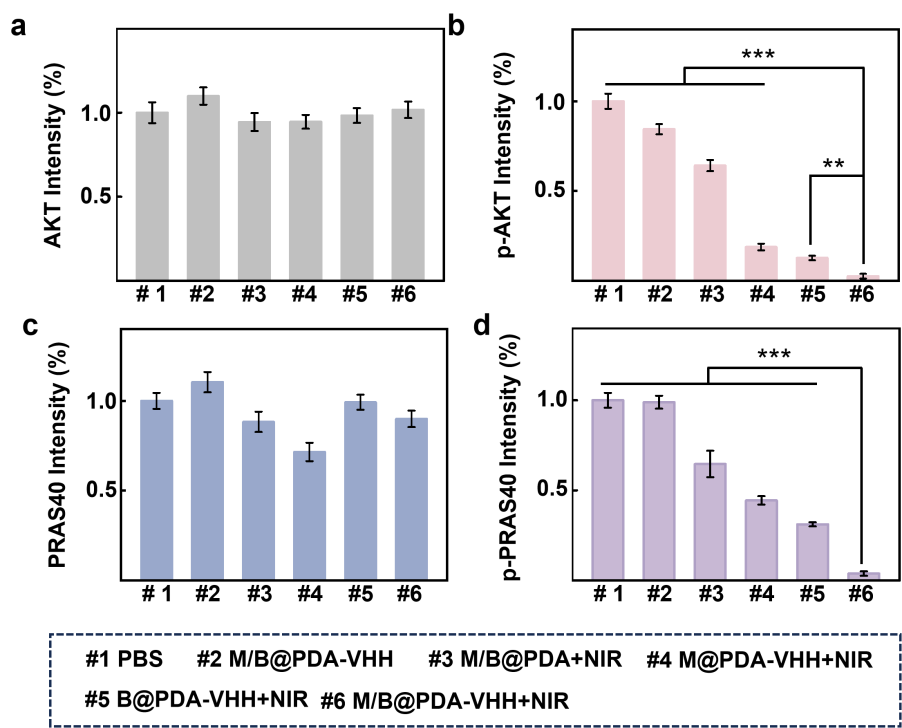


**Fig. S3.** (a) Quantitative immunofluorescence intensity of AKT, (b) p-AKT, (c) PRAS40 and (d) p-PRAS40 in tumor sections(n=3).


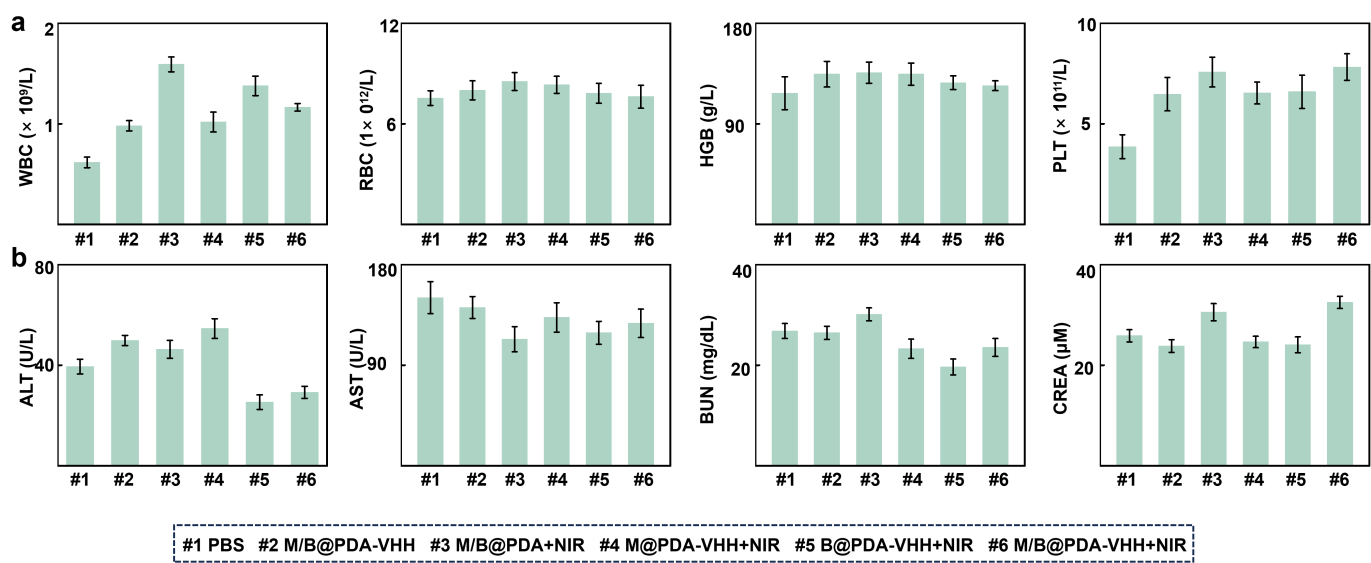


**Fig. S4.** (a) Hematological analysis of WBC, RBC, HGB and PLT count. (b) Biochemical analysis of ALT, AST, BUN, and CREA levels after PBS, M/B@PDA-VHH, M/B@PDA+NIR, M@PDA-VHH+NIR, B@PDA-VHH+NIR and M/B@PDA-VHH+NIR treatment (n = 6). The dashed lines indicate normal reference ranges.


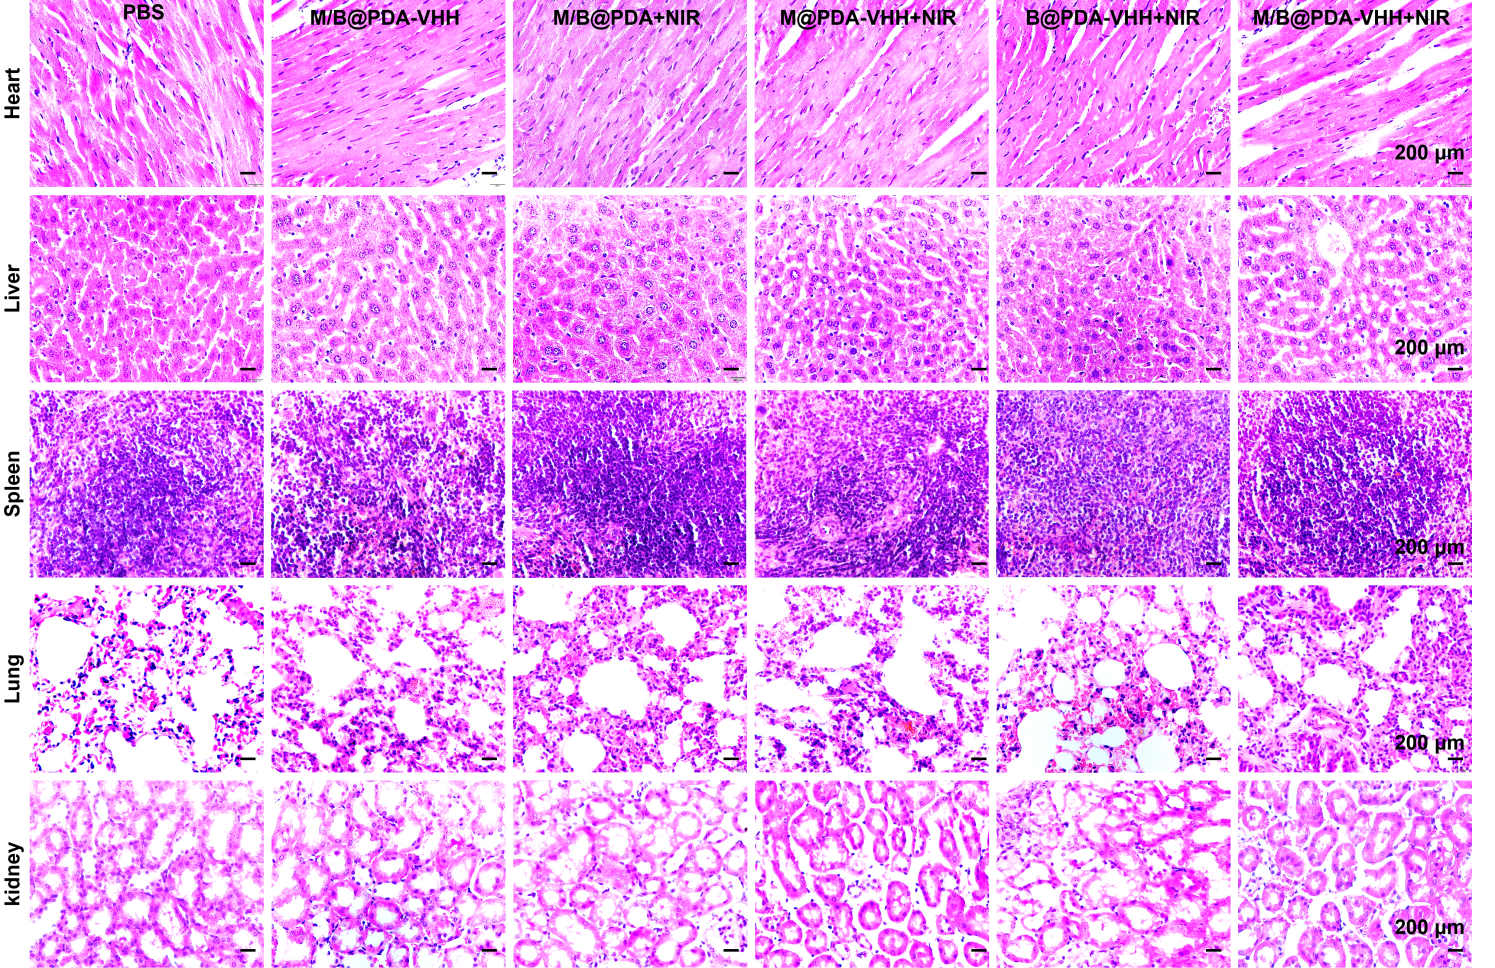


**Fig. S5.** H&E staining images of the heart, liver, spleen, lung, and kidney after different treatment.
